# Supplementary material for: The fishing and natural mortality of large, piscivorous Bull Trout and Rainbow Trout in Kootenay Lake, British Columbia (2008–2013)
Source: PeerJ journal article supplement (doi:10.7717/peerj.2874), 2017-01-10
Supplement: Supplemental_Article_S1.pdf [file Supplemental_Article_S1.pdf]

To replicate the analyses

1. Install R Version ( $\geq 3.3.1$ ) from <https://cran.r-project.org>.
2. Install JAGS ( $\geq 4.2.0$ ) from <http://sourceforge.net/projects/mcmc-jags/files/> to the default location.
3. If using Windows install Rtools ( $\geq 3.3.1$ ) from <https://cran.r-project.org/bin/windows/Rtools/> choosing the default options.
4. Cut and paste the following code into the R console to quickly generate non-convergent results.

```
install.packages("devtools") # if not already installed  
devtools::install_github("poissonconsulting/klexr")
```

```
library(klexr)  
replicate_results()
```

5. Open the `results` folder in the working directory to view the plots which are saved as png files.
6. For more information type `?replicate_results`.
